# Supplementary material
Source: publisher figshare collection journal article supplement (https://acs.figshare.com/ndownloader/files/7788841)
Supplement: Supplementary file 1 [file 7788841]

**Coating Solution for High-Voltage Cathode:  $\text{AlF}_3$  Atomic Layer  
Deposition for Free-standing  $\text{LiCoO}_2$  Electrodes with High Energy  
Density and Excellent Flexibility**

*Yun Zhou<sup>1</sup>, Younghee Lee<sup>2</sup>, Huaxing Sun<sup>2</sup>, Jasmine M. Wallas<sup>2</sup>, Steven M. George<sup>2</sup>,  
and Ming Xie<sup>\*2,3</sup>*

1. Chongqing Normal University, College of Chemistry, Chongqing, 401311, China
2. Department of Chemistry and Biochemistry, University of Colorado at Boulder, Boulder, Colorado, 80309, USA.
3. BattFlex Technologies, Inc, Wuhan, 430079, China

Corresponding author: [ming.xie@battflex.com](mailto:ming.xie@battflex.com) (Ming Xie)

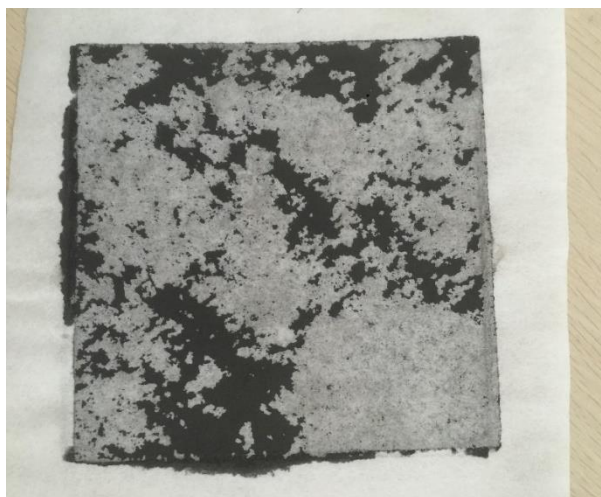

Figure S1 Free-standing LCO electrode sticking to filtration membrane with adding only 2% MWCNTs.

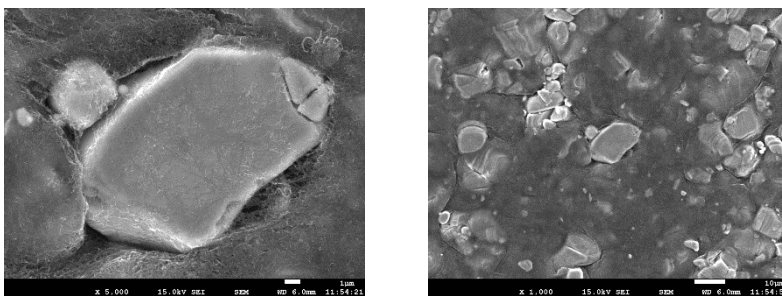

Figure 2. SEM of the electrode after cycling
